# Supplementary material for: Microwave-assisted synthesis of hematite/activated graphene composites with superior performance for photocatalytic reduction of Cr(vi)
Source: Royal Society of Chemistry journal article supplement (doi:10.1039/c5ra15561d), 2015-01-01
Supplement: c5ra15561d1.pdf [file c5ra15561d1.pdf]

## Supplementary Information

### Microwave-Assisted Synthesis of Hematite/Activated Graphene Composites with Superior Performance for Photocatalytic Reduction of Cr(VI)

Yuanxin Du, <sup>a</sup> Zhuchen Tao, <sup>a</sup> Jian Guan, <sup>a</sup> Zijun Sun, <sup>a</sup> Wencong Zeng, <sup>a</sup> Pengchao Wen, <sup>a</sup> Kun Ni, <sup>a</sup> Jianglin Ye, <sup>a</sup> Shangfeng Yang, <sup>a</sup> Pingwu Du <sup>a,b</sup> and Yanwu Zhu <sup>a,b,\*</sup>

<sup>a</sup> Key Laboratory of Materials for Energy Conversion, Chinese Academy of Sciences, Department of Materials Science and Engineering, University of Science and Technology of China, 96 Jin Zhai Rd, Hefei, Anhui Province, 230026, P. R. China

<sup>b</sup> iChEM (Collaborative Innovation Center of Chemistry for Energy Materials), University of Science and Technology of China, 96 Jin Zhai Rd, Hefei, Anhui Province, 230026, P. R. China

\* Address correspondence to zhuyanwu@ustc.edu.cn

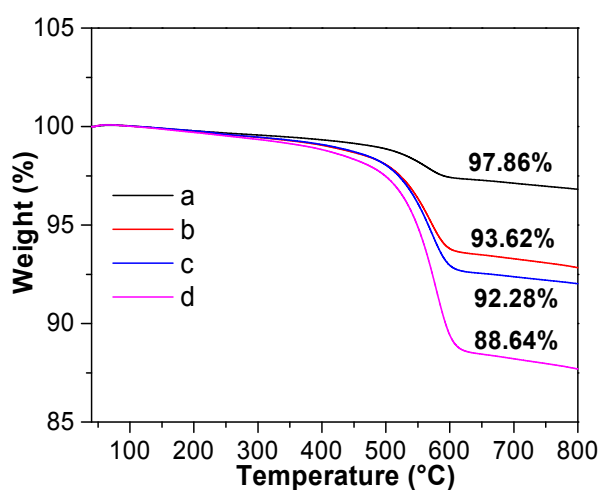

**Figure S1.** The TG curves of (a)  $\alpha$ -Fe<sub>2</sub>O<sub>3</sub>/aMEGO-1, (b)  $\alpha$ -Fe<sub>2</sub>O<sub>3</sub>/aMEGO-2, (c)  $\alpha$ -Fe<sub>2</sub>O<sub>3</sub>/aMEGO-3 and (d)  $\alpha$ -Fe<sub>2</sub>O<sub>3</sub>/aMEGO-4.

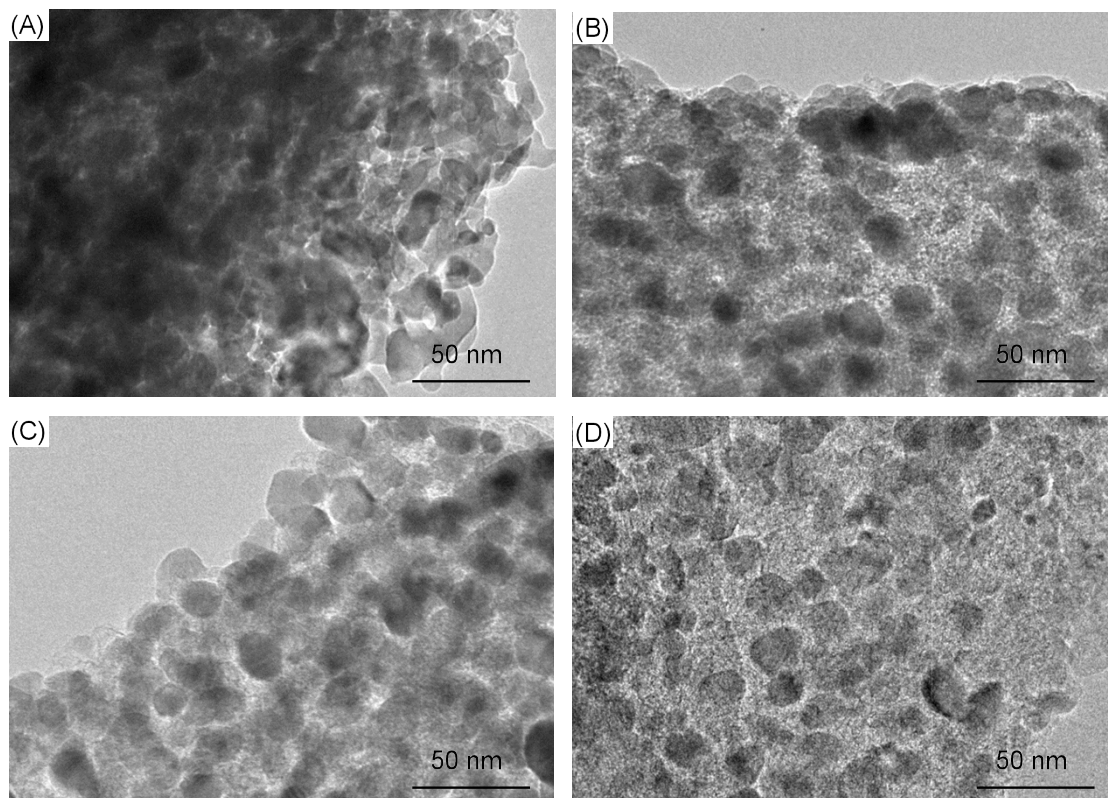

**Figure S2.** TEM images of (A)  $\alpha$ -Fe<sub>2</sub>O<sub>3</sub>/aMEGO-1, (B)  $\alpha$ -Fe<sub>2</sub>O<sub>3</sub>/aMEGO-2, (C)  $\alpha$ -Fe<sub>2</sub>O<sub>3</sub>/aMEGO-3 and (D)  $\alpha$ -Fe<sub>2</sub>O<sub>3</sub>/aMEGO-4.

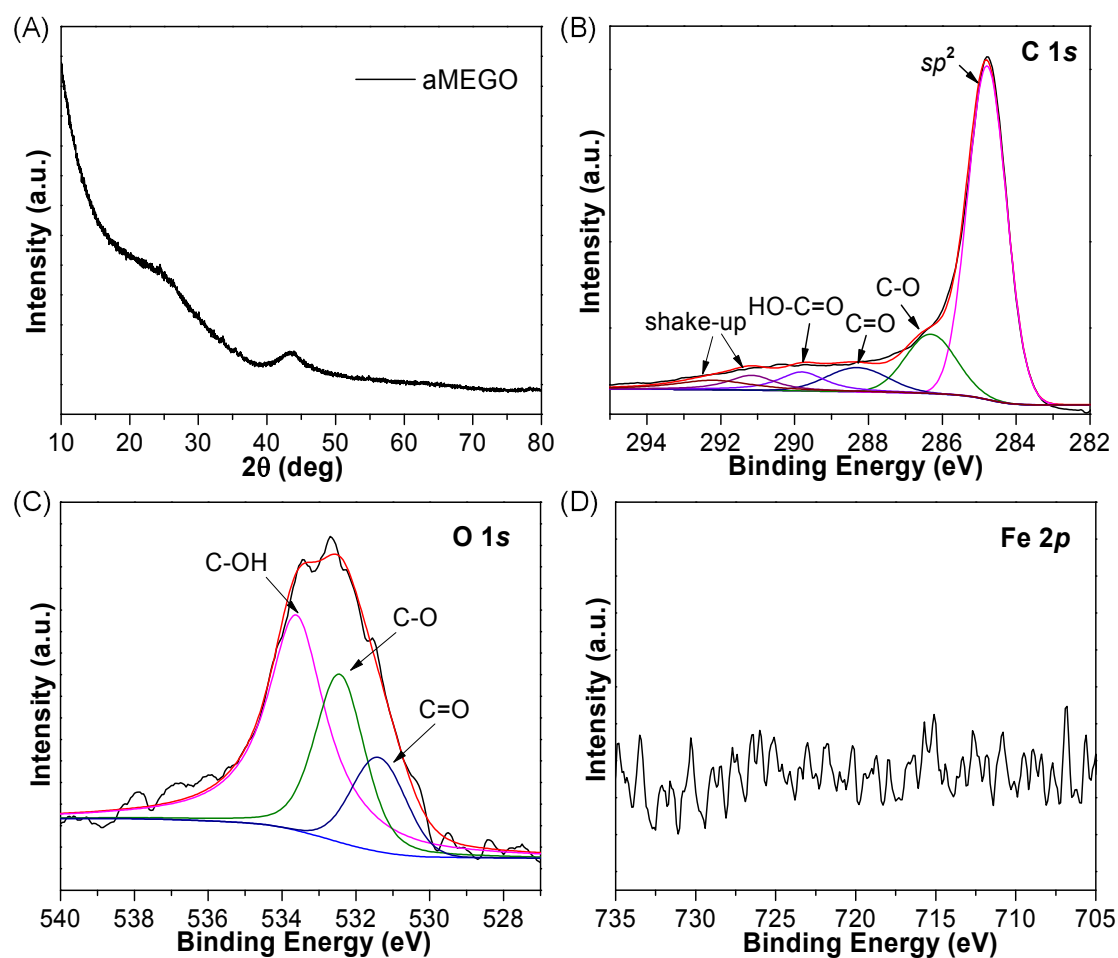

**Figure S3.** XRD pattern (A) and XPS spectra of aMEGO: (B) C 1s spectrum, (C) O 1s spectrum and (D) Fe 2p spectrum.

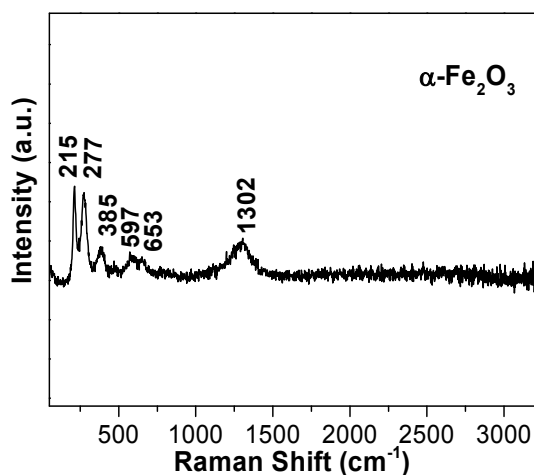

**Figure S4.** Raman spectrum of  $\alpha\text{-Fe}_2\text{O}_3$ . The peaks at 215, 277, 385, 597 and 653  $\text{cm}^{-1}$  can be identified as the  $A_{1g}(1)$ ,  $E_g(2)$ ,  $E_g(4)$ ,  $E_g(5)$  and  $E_u$  bands of hematite. The peak at 1302  $\text{cm}^{-1}$  is magnon scattering peak.

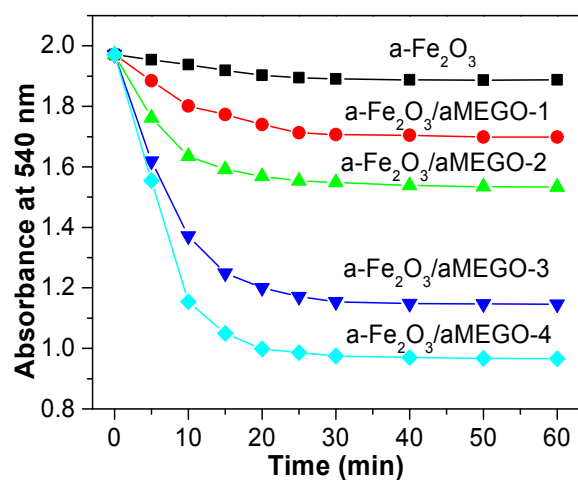

**Figure S5.** Adsorption-desorption equilibrium curves of Cr(VI) by  $\alpha\text{-Fe}_2\text{O}_3$  and  $\alpha\text{-Fe}_2\text{O}_3$ /aMEGO composites.

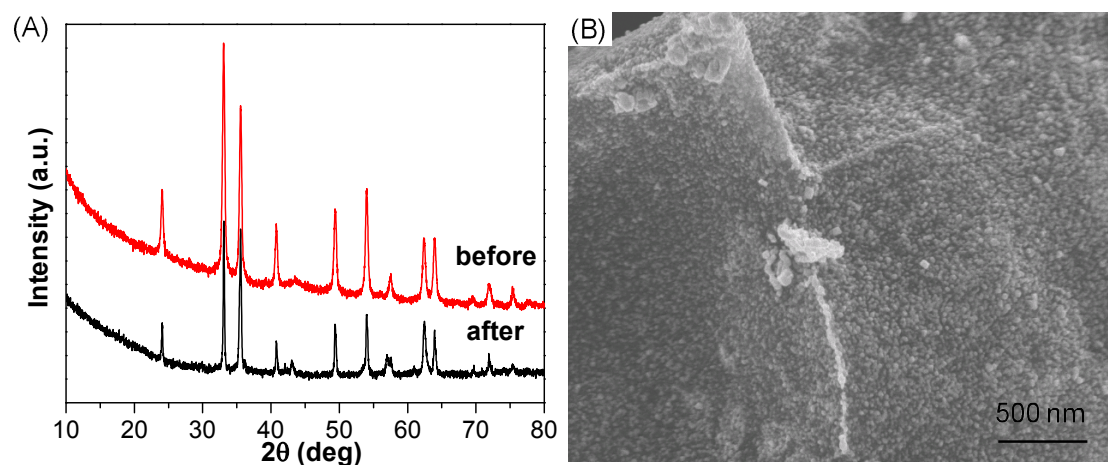

**Figure S6.** XRD pattern (A) and SEM image (B) of the  $\alpha\text{-Fe}_2\text{O}_3$ /aMEGO-3 after reusing three times.

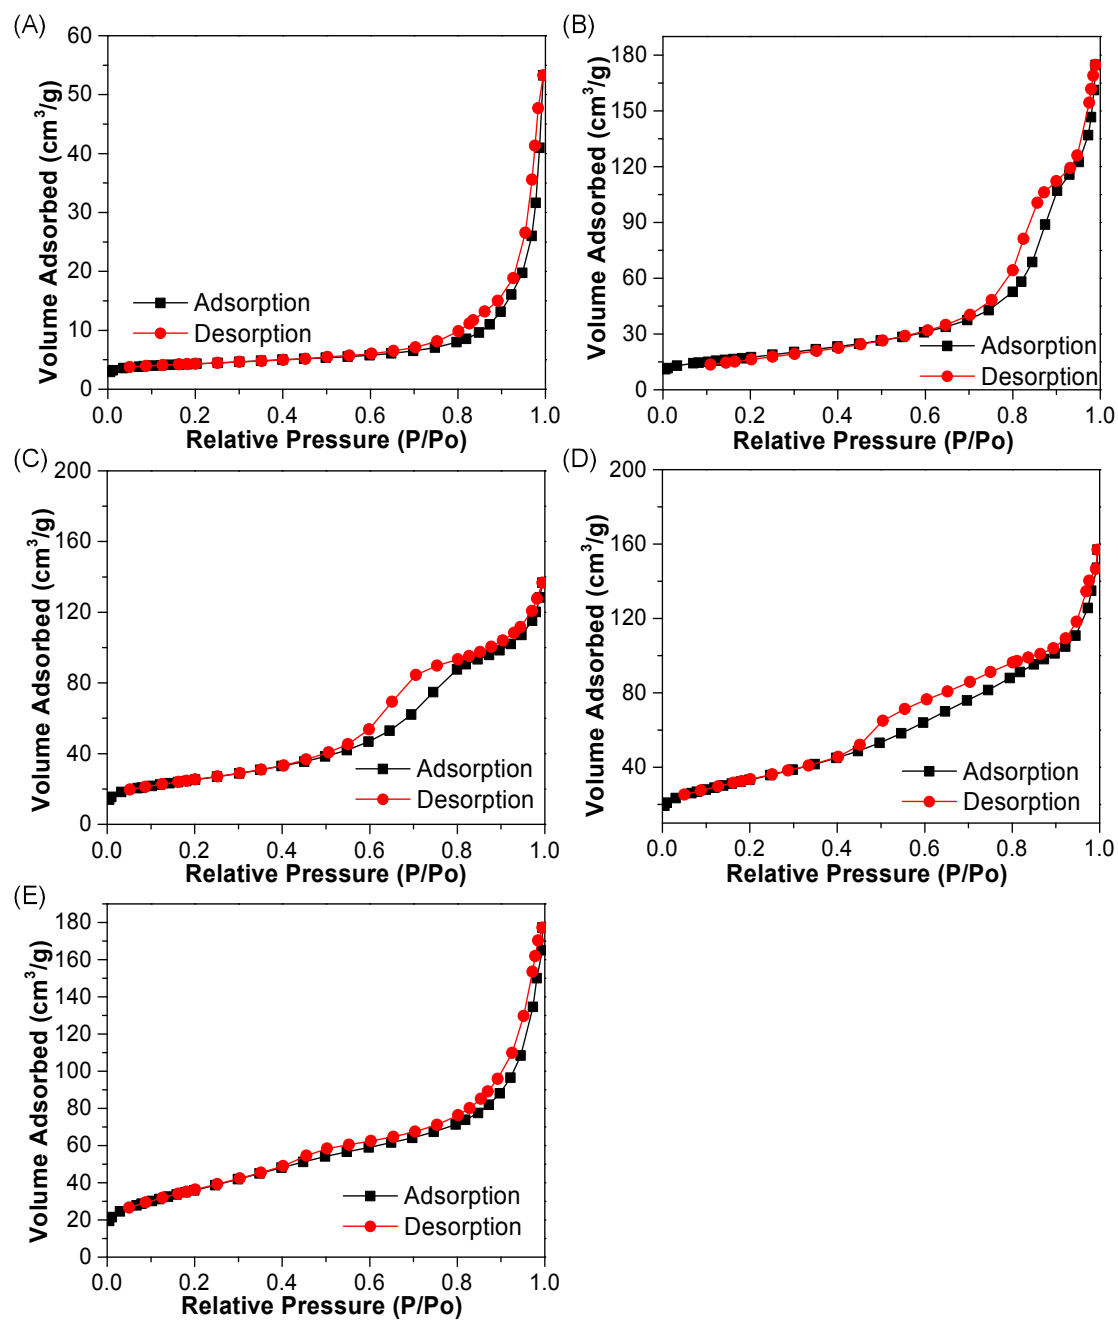

**Figure S7.** Nitrogen adsorption-desorption isotherms for (A)  $\alpha$ -Fe<sub>2</sub>O<sub>3</sub>, (B)  $\alpha$ -Fe<sub>2</sub>O<sub>3</sub>/aMEGO-1, (C)  $\alpha$ -Fe<sub>2</sub>O<sub>3</sub>/aMEGO-2, (D)  $\alpha$ -Fe<sub>2</sub>O<sub>3</sub>/aMEGO-3 and (E)  $\alpha$ -Fe<sub>2</sub>O<sub>3</sub>/aMEGO-4.

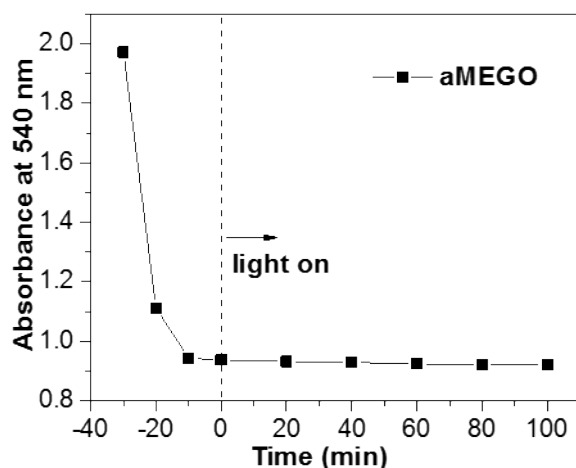

**Figure S8.** Absorption changes at 540 nm of DPC-Cr(VI) complex solutions in the presence of aMEGO with variation irradiation time. (experimental parameters: 5mg aMEGO, 50 ml, 10 mg/l Cr(VI) solutions, before or after 0: in the dark or under visible light irradiation)

**Table S1.** Comparison of the Cr(VI) reduction efficiency of  $\alpha$ -Fe<sub>2</sub>O<sub>3</sub>/aMEGO with other graphene-based photocatalysts.

| Sample name                                           | Graphene loading | Concentration of Cr(VI) solution | Catalyst concentration | Light source                                                                               | Irradiation time | Reduction ratio | Reference |
|-------------------------------------------------------|------------------|----------------------------------|------------------------|--------------------------------------------------------------------------------------------|------------------|-----------------|-----------|
| P25                                                   |                  | 10 mg/L                          | 1g/L                   | 500 W Hg lamp to obtain UV irradiation                                                     | 240 min          | 70%             | 1         |
| TiO <sub>2</sub>                                      |                  |                                  |                        |                                                                                            |                  | 82%             |           |
| TiO <sub>2</sub> /RGO                                 | 0.8 wt%          |                                  |                        |                                                                                            |                  | 90%             |           |
| CdS                                                   |                  | 10mg/L                           | 1g/L                   | 400 W metal halogen lamp with cut off filter ( $\lambda > 400$ nm) to obtain visible light | 240 min          | 80%             | 2         |
| CdS/RGO                                               | 1.5 wt%          |                                  |                        |                                                                                            |                  | 91%             |           |
| ZnO                                                   |                  | 10mg/L                           | 1g/L                   | 500 W Hg lamp to obtain UV irradiation                                                     | 240 min          | 58%             | 3         |
| ZnO/RGO                                               | 1.0 wt%          |                                  |                        |                                                                                            |                  | 95%             |           |
| Bi <sub>2</sub> WO <sub>6</sub>                       |                  | 30 mg/L                          | 1.5g/L                 | 300 W halogen tungsten or 300 W Xe lamp with a cut off filter to obtain UV irradiation     | 120 min          | 43%             | 4         |
| Bi <sub>2</sub> WO <sub>6</sub> -20GO-alginate sodium | 20 mg            |                                  |                        |                                                                                            |                  | 93%             |           |
| Bi <sub>2</sub> WO <sub>6</sub>                       |                  |                                  |                        |                                                                                            |                  | 30 mg/L         |           |

|                                                                  |          |        |          |                                                                                  |            |        |                 |
|------------------------------------------------------------------|----------|--------|----------|----------------------------------------------------------------------------------|------------|--------|-----------------|
| Bi <sub>2</sub> WO <sub>6</sub> -<br>20GO-<br>alginate<br>sodium | 20 mg    |        |          | tungsten or 300 W<br>Xe lamp with a cut<br>off filter to obtain<br>visible light | min        | 85%    |                 |
| ZnO                                                              |          | 10mg/L | 1g/L     | 500 W Hg lamp to<br>obtain UV<br>irradiation                                     | 240<br>min | 68%    | 5               |
| ZnO/RGO                                                          | 1.0 wt%  |        |          |                                                                                  |            | 96%    |                 |
| TiO <sub>2</sub>                                                 |          | 12mg/L | 0.2g/L   | 125 W Hg lamp<br>with cut off filter<br>(λ>450 nm) to<br>obtain visible light    | 240<br>min | 14%    | 6               |
| TiO <sub>2</sub> /RGO                                            |          |        |          |                                                                                  |            | 80%    |                 |
| TiO <sub>2</sub>                                                 |          | 10mg/L | 0.5g/L   | 230 W Hg lamp to<br>obtain UV<br>irradiation                                     | 60 min     | 14%    | 7               |
| TiO <sub>2</sub> /RGO                                            | 2.5 wt%  |        |          |                                                                                  |            | 18%    |                 |
| UiO-<br>66(NH <sub>2</sub> )                                     |          | 10mg/L | 0.5g/L   | 300 W Xe lamp<br>with cut off filter<br>(λ>420 nm) to<br>obtain visible light    | 100<br>min | 35%    | 8               |
| RGO-<br>UiO-<br>66(NH <sub>2</sub> )                             | 2.0 wt%  |        |          |                                                                                  |            | 99%    |                 |
| a-FeOOH<br>nanorod                                               |          | 10mg/L | 1g/L     | 300 W Xe lamp<br>with cut off filter<br>(λ>400 nm) to<br>obtain visible light    | 180<br>min | 26%    | 9               |
| a-FeOOH<br>nanorod/R<br>GO                                       | 3.0 wt%  |        |          |                                                                                  |            | 94%    |                 |
| ZnO                                                              |          | 5mg/L  | 0.5g/L   | 300 W Xe lamp<br>with cut off filter<br>(λ>400 nm) to<br>obtain visible light    | 150<br>min | 1%     | 10              |
| ZnO/RGO                                                          | 3.0 wt%  |        |          |                                                                                  |            | 34%    |                 |
| CdS                                                              |          | 20mg/L | 0.3g/L   | 300 W Xe lamp<br>with cut off filter<br>(λ>420 nm) to<br>obtain visible light    | 20 min     | 40%    | 11              |
| CdS/RGO                                                          | 0.5 wt%  |        |          |                                                                                  |            | 49%    |                 |
| CdS                                                              |          | 10mg/L | 0.175g/L | 500 W Xe lamp<br>with cut off filter<br>(λ>420 nm) to<br>obtain visible light    | 35 min     | 35%    | 12              |
| CdS/RGO                                                          |          |        |          |                                                                                  |            | 78%    |                 |
| ZnS                                                              |          | 20mg/L |          | A solar simulator<br>equipped with an<br>AM 1.5 G filter and<br>a 150 W Xe lamp  | 60 min     | 19%    | 13              |
| ZnS/graph<br>ene<br>aerogels                                     |          |        |          |                                                                                  |            | 61%    |                 |
| α-Fe <sub>2</sub> O <sub>3</sub>                                 |          | 10mg/L | 1g/L     | 300 W Xe lamp<br>with cut off filter<br>(λ>420 nm) to<br>obtain visible light    | 160<br>min | 25.26% | Present<br>work |
| α-<br>Fe <sub>2</sub> O <sub>3</sub> /aM<br>EGO                  | 7.72 wt% |        |          |                                                                                  |            | 95.28% |                 |

## Reference

1. X. Liu, L. Pan, T. Lv, G. Zhu, T. Lu, Z. Sun and C. Sun, *RSC Adv.*, 2011, **1**, 1245–1249.
2. X. Liu, L. Pan, T. Lv, G. Zhu, Z. Sun and C. Sun, *Chem. Commun.*, 2011, **47**, 11984–11986.
3. X. Liu, L. Pan, T. Lv, T. Lu, G. Zhu, Z. Sun and C. Sun, *Catal. Sci. Technol.*, 2011, **1**, 1189–1193.
4. H. Ma, J. Shen, M. Shi, X. Lu, Z. Li, Y. Long, N. Li and M. Ye, *Applied Catalysis B: Environmental*, 2012, **121**, 198–205.
5. X. Liu, L. Pan, Q. Zhao, T. Lv, G. Zhu, T. Chen, T. Lu, Z. Sun and C. Sun, *Chemical Engineering Journal*, 2012, **183**, 238–243.
6. Y. Zhao, D. Zhao, C. Chen and X. Wang, *Journal of Colloid and Interface Science*, 2013, **405**, 211–217.
7. C. Wang, M. Cao, P. Wang, Y. Ao, J. Hou and J. Qian, *Applied Catalysis A: General*, 2014, **473**, 83–89.
8. L. Shen, L. Huang, S. Liang, R. Liang, N. Qin and L. Wu, *RSC Adv.*, 2014, **4**, 2546–2549.
9. D. K. Padhi and K. Parida, *J. Mater. Chem. A*, 2014, **2**, 10300–10312.
10. X. Pan, M. Yang and Y. J. Xu, *Phys. Chem. Chem. Phys.*, 2014, **16**, 5589–5599.
11. S. Liu, M. Q. Yang and Y. J. Xu, *J. Mater. Chem. A*, 2014, **2**, 430–440.
12. S. Wang, J. Li, X. Zhou, C. Zheng, J. Ning, Y. Zhong and Y. Hu, *J. Mater. Chem. A*, 2014, **2**, 19815–19821.



13. D. A. Reddy, J. Choi, S. Lee, R. Ma and T. K. Kim, *RSC Adv.*, 2015, **5**, 18342–18351.
